# Supplementary material
Source: PubMed Central journal article supplement (PMC2860252)

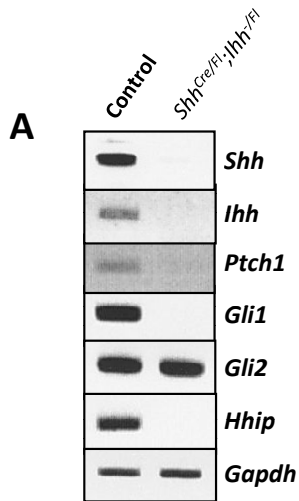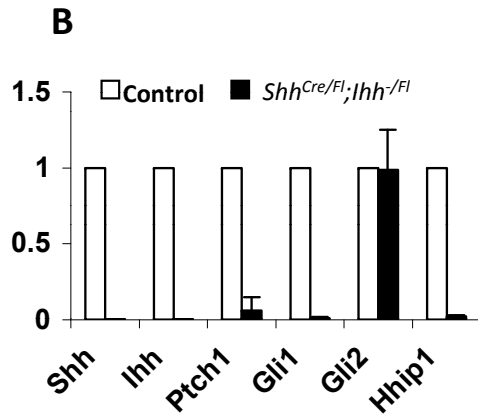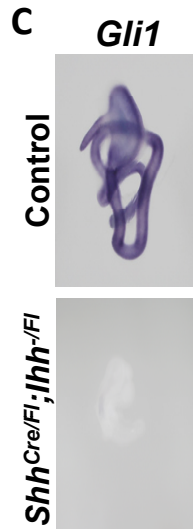

Supplement: supp_137.10.1721_044586FigS1.pdf [file supp_137.10.1721_044586FigS1.pdf]

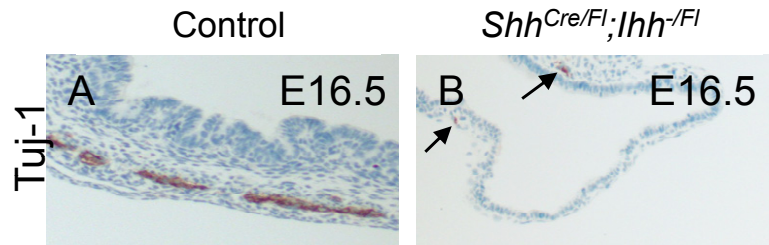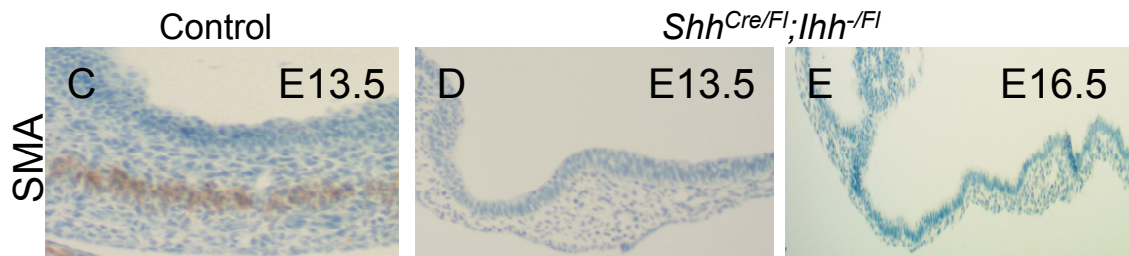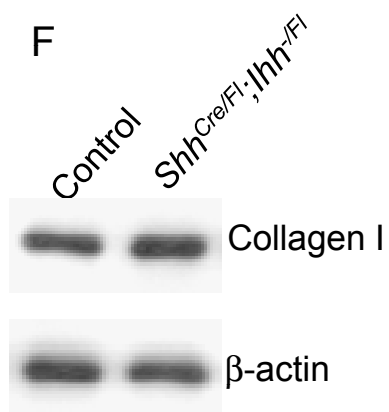

Supplement: supp_137.10.1721_044586FigS2.pdf [file supp_137.10.1721_044586FigS2.pdf]

**A**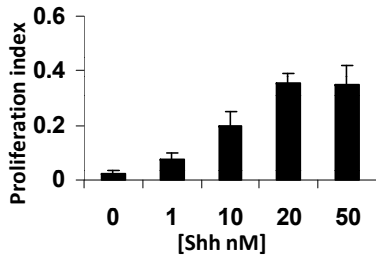**B**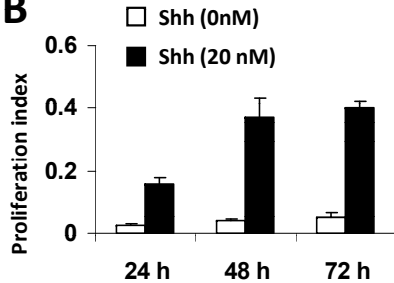

Supplement: supp_137.10.1721_044586FigS3.pdf [file supp_137.10.1721_044586FigS3.pdf]

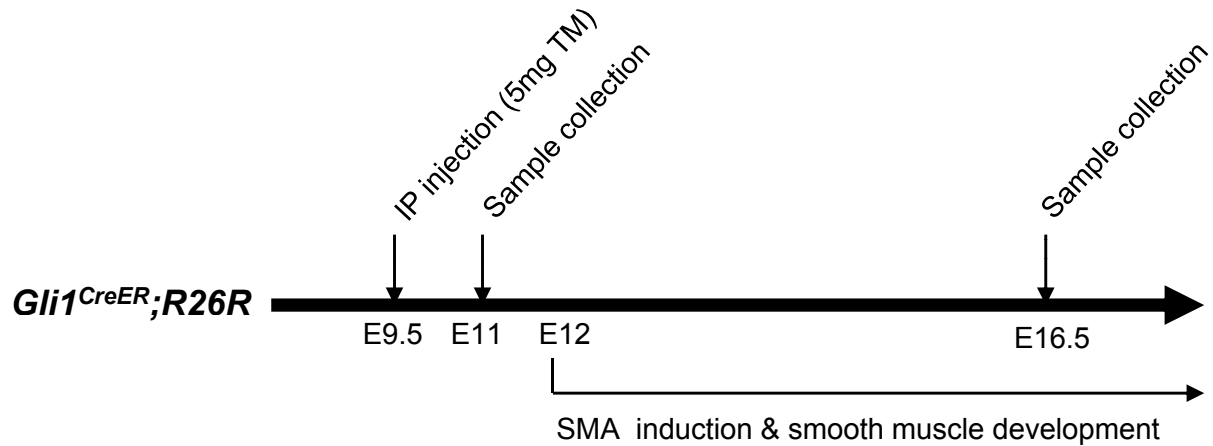

Supplement: supp_137.10.1721_044586FigS4.pdf [file supp_137.10.1721_044586FigS4.pdf]

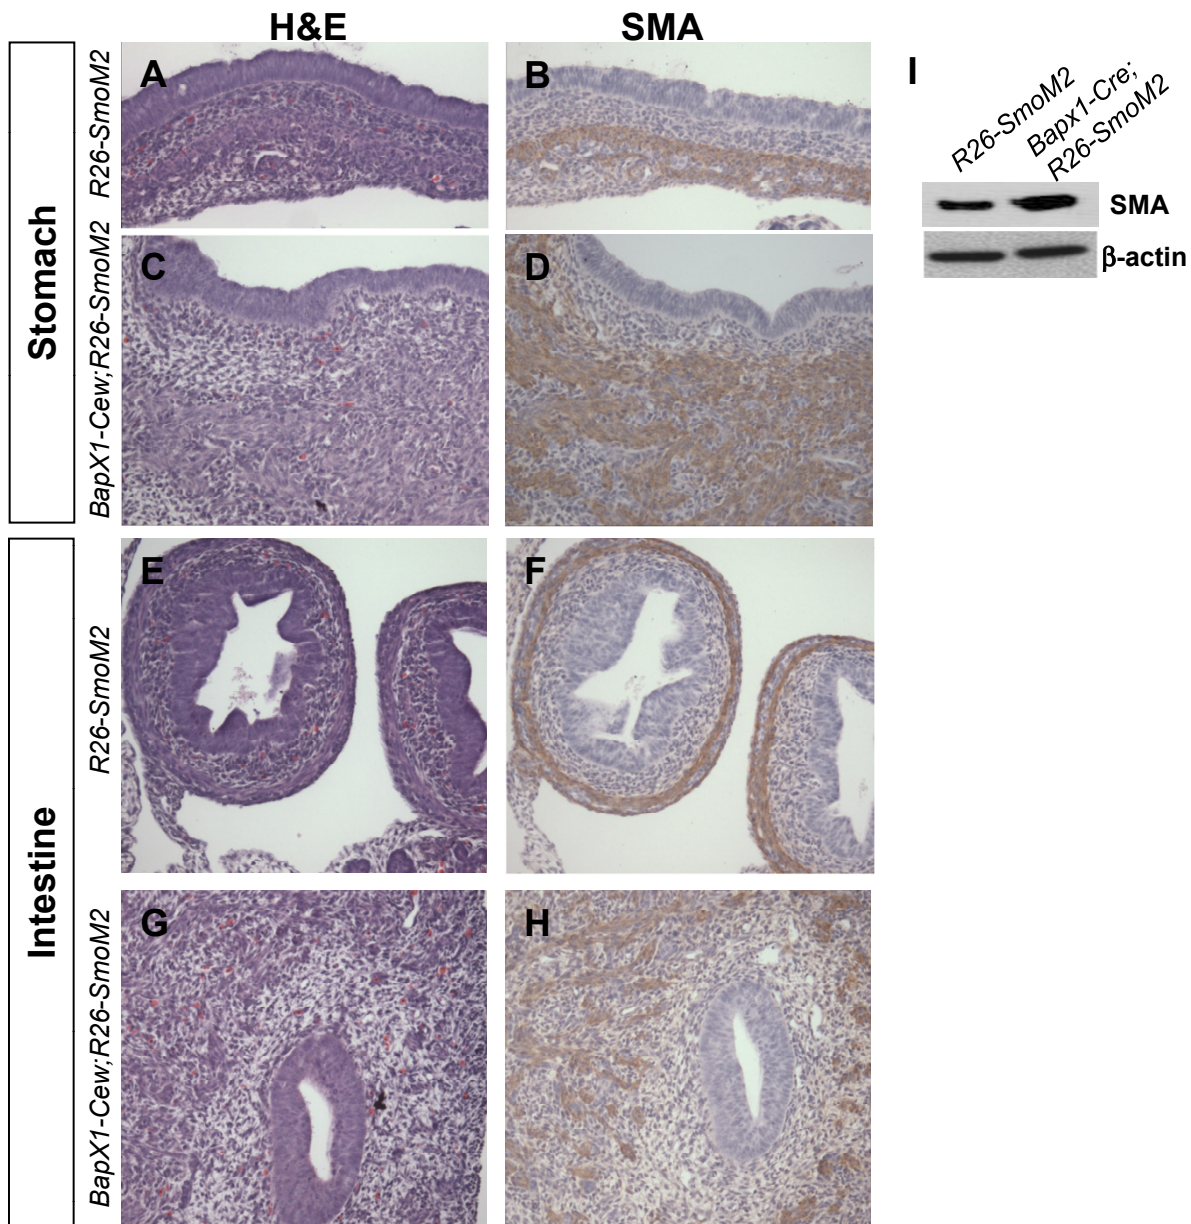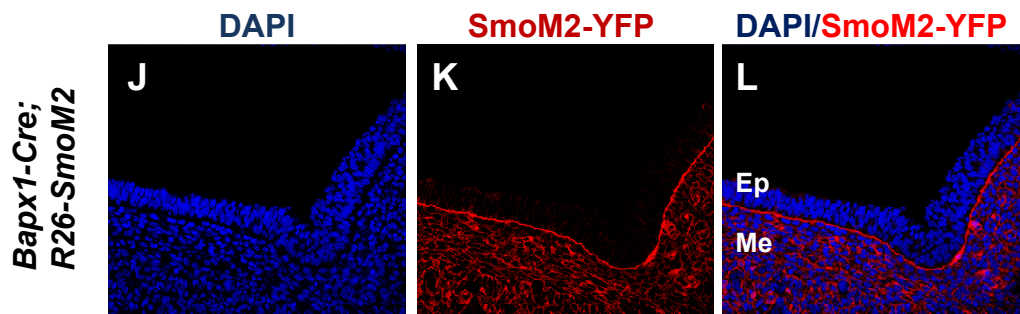

Supplement: supp_137.10.1721_044586FigS5.pdf [file supp_137.10.1721_044586FigS5.pdf]
